# Supplementary material for: The role of glycogen synthase kinase-3β (GSK-3β) in endometrial carcinoma: A carcinogenesis, progression, prognosis, and target therapy marker
Source: PubMed Central journal article supplement (PMC5053670; doi:10.18632/oncotarget.8485), 2016-03-30
Supplement: oncotarget-07-27538-s001.pdf [file oncotarget-07-27538-s001.pdf]

## The role of glycogen synthase kinase-3 $\beta$ (GSK-3 $\beta$ ) in endometrial carcinoma: A carcinogenesis, progression, prognosis, and target therapy marker

### Supplementary Materials

Supplementary Table S1: Primers for RT-PCR

| Gene                           | Primer sequence                                                    | Annealing temperature (°C) | Extension time (sec) |
|--------------------------------|--------------------------------------------------------------------|----------------------------|----------------------|
| <i>GSK-3<math>\beta</math></i> | F: 5'-GGCAGCATGAAAGTTAGCAG-3'<br>R: 5'-GGCGACCAGTTCTCCTGAAT-3'     | 60                         | 34                   |
| <i>NF-<math>\kappa</math>B</i> | F: 5'-GAAGAAGCGAGACCTGGA-3'<br>R: 5'-TCCGGAACACAATGGCCA-3'         | 60                         | 34                   |
| <i>CyclinD1</i>                | F: 5'-TGCTGGAGGTCTGCGAGGAAC-3'<br>R: 5'-AGGAAGCGTGTGAGGCGGTAG-3'   | 60                         | 34                   |
| <i>MMP9</i>                    | F: 5'-GTGCTGGGCTGCTGCTTTGCTG-3'<br>R: 5'-GTCGCCCTCAAAGGTTTGGAAT-3' | 60                         | 34                   |
| <i>P21</i>                     | F: 5'-CTCAGAGGAGGCGCCATG-3'<br>R: 5'-GGGCGGATTAGGGCTTCC-3'         | 60                         | 34                   |
| <i>18s</i>                     | F: 5'-ACGGACAGGATTGACAGATT-3'<br>R: 5'-GGCGTAGGGTAGGCACA-3'        | 60                         | 34                   |
